# Supplementary material for: Role of density and electrostatic interactions in the viscosity and non-newtonian behavior of ionic liquids – a molecular dynamics study
Source: Royal Society of Chemistry journal article supplement (doi:10.1039/d1cp05692a), 2022-01-01
Supplement: d1cp05692a1.pdf [file d1cp05692a1.pdf]

**Supporting information for**

**Role of density and electrostatic interactions on the viscosity and non-newtonian behavior of ionic liquid - a molecular dynamics study**

Kalil Bernardino,<sup>1\*</sup> Mauro C. C. Ribeiro<sup>1</sup>

<sup>1</sup> *Laboratório de Espectroscopia Molecular, Departamento de Química Fundamental, Instituto de Química, Universidade de São Paulo, Av. Prof. Lineu Prestes 748, 05508-000, Brazil*

**\*email: kalil.bernardino@gmail.com**

**Contents:**

|                                                               |   |
|---------------------------------------------------------------|---|
| 1. Block average data for viscosity error estimation          | 2 |
| 2. Parameters of Carreau equation fit                         | 5 |
| 3. Additional images with Carreau equation fit                | 6 |
| 4. Cation-cation and anion-anion radial distribution function | 8 |

## 1. Block average data for viscosity error estimation

**Table S1** – Viscosity data  $\eta_i$  from each block  $i$  used to estimate the error of computed viscosity from NEMD simulations of system S1 (electrostatic interactions attenuated by a relative dielectric constant of 5 and density equilibrated at 1 atm). Values in mPa.s.

| $\gamma'$ (GHz) | $\eta_1$ | $\eta_2$ | $\eta_3$ | $\eta_4$ | $\eta_5$ | $\eta_{\text{total}}$ | error  |
|-----------------|----------|----------|----------|----------|----------|-----------------------|--------|
| 0.2             | 8.031    | 8.188    | 7.860    | 7.247    | 7.850    | 7.835                 | 0.3568 |
| 0.3             | 7.438    | 7.814    | 7.872    | 8.148    | 7.710    | 7.796                 | 0.2576 |
| 0.5             | 8.224    | 7.938    | 8.287    | 8.192    | 8.147    | 8.158                 | 0.1329 |
| 0.8             | 8.047    | 7.835    | 7.993    | 7.809    | 7.775    | 7.892                 | 0.1204 |
| 1.0             | 7.656    | 7.775    | 7.679    | 7.577    | 7.713    | 7.680                 | 0.0728 |
| 2.0             | 6.983    | 7.045    | 7.016    | 7.003    | 7.062    | 7.022                 | 0.0316 |
| 3.0             | 6.375    | 6.452    | 6.394    | 6.403    | 6.396    | 6.404                 | 0.0286 |
| 5.0             | 5.399    | 5.357    | 5.399    | 5.382    | 5.382    | 5.384                 | 0.0173 |
| 10.0            | 3.963    | 3.956    | 3.969    | 3.943    | 3.953    | 3.957                 | 0.0101 |
| 20.0            | 2.770    | 2.765    | 2.761    | 2.766    | 2.774    | 2.767                 | 0.0050 |
| 30.0            | 2.221    | 2.219    | 2.219    | 2.221    | 2.219    | 2.220                 | 0.0009 |
| 40.0            | 1.894    | 1.893    | 1.895    | 1.894    | 1.895    | 1.894                 | 0.0007 |
| 50.0            | 1.679    | 1.676    | 1.677    | 1.677    | 1.678    | 1.677                 | 0.0014 |
| 100.0           | 1.159    | 1.159    | 1.158    | 1.158    | 1.158    | 1.158                 | 0.0004 |
| 200.0           | 0.822    | 0.822    | 0.822    | 0.822    | 0.823    | 0.822                 | 0.0005 |



**Table S4** – Viscosity data  $\eta_i$  from each block  $i$  used to estimate the error of computed viscosity from NEMD simulations of system S4 (without charges and with the same density of S1). Values in mPa.s.

| $\gamma'$ (GHz) | $\eta_1$ | $\eta_2$ | $\eta_3$ | $\eta_4$ | $\eta_5$ | $\eta_{\text{total}}$ | error  |
|-----------------|----------|----------|----------|----------|----------|-----------------------|--------|
| 0.2             | 1.480    | 1.657    | 1.626    | 1.957    | 1.481    | 1.640                 | 0.1947 |
| 0.3             | 1.695    | 1.760    | 1.559    | 1.707    | 1.539    | 1.652                 | 0.0973 |
| 0.5             | 1.755    | 1.799    | 1.659    | 1.724    | 1.739    | 1.735                 | 0.0508 |
| 0.8             | 1.654    | 1.604    | 1.728    | 1.640    | 1.641    | 1.653                 | 0.0455 |
| 1.0             | 1.661    | 1.678    | 1.617    | 1.666    | 1.615    | 1.647                 | 0.0293 |
| 2.0             | 1.660    | 1.668    | 1.695    | 1.665    | 1.663    | 1.670                 | 0.0141 |
| 3.0             | 1.666    | 1.646    | 1.681    | 1.681    | 1.656    | 1.666                 | 0.0153 |
| 5.0             | 1.672    | 1.643    | 1.670    | 1.658    | 1.668    | 1.662                 | 0.0121 |
| 10.0            | 1.603    | 1.603    | 1.602    | 1.595    | 1.602    | 1.601                 | 0.0036 |
| 20.0            | 1.451    | 1.453    | 1.452    | 1.454    | 1.454    | 1.453                 | 0.0011 |
| 30.0            | 1.322    | 1.320    | 1.318    | 1.319    | 1.320    | 1.320                 | 0.0017 |
| 40.0            | 1.214    | 1.213    | 1.215    | 1.212    | 1.212    | 1.213                 | 0.0013 |
| 50.0            | 1.128    | 1.128    | 1.127    | 1.127    | 1.129    | 1.128                 | 0.0007 |
| 100.0           | 0.871    | 0.870    | 0.871    | 0.871    | 0.870    | 0.871                 | 0.0003 |
| 200.0           | 0.665    | 0.665    | 0.665    | 0.665    | 0.665    | 0.665                 | 0.0001 |

**Table S5** – Viscosity data  $\eta_i$  from each block  $i$  used to estimate the error of computed viscosity from NEMD simulations of system S5 (without charges and with the same density of S2). Values in mPa.s.

| $\gamma'$ (GHz) | $\eta_1$ | $\eta_2$ | $\eta_3$ | $\eta_4$ | $\eta_5$ | $\eta_{\text{total}}$ | error  |
|-----------------|----------|----------|----------|----------|----------|-----------------------|--------|
| 0.3             | 1.063    | 1.103    | 0.795    | 1.019    | 0.966    | 0.989                 | 0.1201 |
| 0.5             | 1.017    | 1.111    | 1.079    | 1.082    | 1.104    | 1.079                 | 0.0370 |
| 0.8             | 0.946    | 1.053    | 0.991    | 0.968    | 0.967    | 0.985                 | 0.0412 |
| 1.0             | 0.997    | 0.991    | 0.996    | 1.020    | 1.027    | 1.006                 | 0.0162 |
| 2.0             | 1.009    | 1.010    | 1.021    | 1.010    | 0.974    | 1.005                 | 0.0179 |
| 3.0             | 0.995    | 1.002    | 1.030    | 1.010    | 1.028    | 1.013                 | 0.0154 |
| 5.0             | 1.002    | 0.994    | 0.997    | 1.009    | 0.996    | 1.000                 | 0.0060 |
| 10.0            | 0.991    | 0.981    | 0.984    | 0.985    | 0.989    | 0.986                 | 0.0040 |
| 20.0            | 0.945    | 0.948    | 0.942    | 0.946    | 0.948    | 0.946                 | 0.0022 |
| 30.0            | 0.898    | 0.899    | 0.900    | 0.902    | 0.902    | 0.900                 | 0.0017 |
| 40.0            | 0.854    | 0.855    | 0.855    | 0.855    | 0.855    | 0.855                 | 0.0005 |
| 50.0            | 0.815    | 0.815    | 0.814    | 0.814    | 0.814    | 0.814                 | 0.0006 |
| 100.0           | 0.671    | 0.671    | 0.671    | 0.670    | 0.671    | 0.671                 | 0.0003 |
| 200.0           | 0.534    | 0.535    | 0.536    | 0.535    | 0.535    | 0.535                 | 0.0005 |

## 2. Parameters of Carreau equation fit

**Table S6** – Parameter  $\lambda$  (ns) for Carreau equation fit for the dependence of viscosity, dimer lifetime and relative differences of radial distribution function with the shear rate in the five systems studied

| Property                                                | S1    | S2    | S3    | S4    | S5    |
|---------------------------------------------------------|-------|-------|-------|-------|-------|
| viscosity                                               | 0.372 | 0.059 | 0.022 | 0.050 | 0.033 |
| $E_{\text{coul}}$                                       | 0.079 | 0.032 | ----  | ----  | ----  |
| $E_{\text{dispesion}}$                                  | 0.049 | 0.018 | 0.011 | 0.021 | 0.014 |
| $\Delta g(r)_{\text{rel}}$ cation-anion 1 <sup>st</sup> | 0.099 | 0.033 | 0.020 | 0.043 | 0.025 |
| $\Delta g(r)_{\text{rel}}$ cation-anion 2 <sup>nd</sup> | 0.193 | 0.073 | ----  | ----  | ----  |
| $\Delta g(r)_{\text{rel}}$ cation-anion 3 <sup>rd</sup> | 0.281 | 0.059 | 0.016 | 0.035 | 0.026 |
| $\Delta g(r)_{\text{rel}}$ anion-anion                  | 0.319 | 0.060 | 0.066 | 0.106 | 0.103 |
| $\Delta g(r)_{\text{rel}}$ cation-cation                | 0.195 | 0.044 | ----  | ----  | ----  |
| $t_p$ cation-anion                                      | 0.478 | 0.102 | 0.052 | 0.102 | 0.065 |
| $t_p$ anion-anion                                       | 0.506 | 0.094 | 0.046 | 0.088 | 0.057 |
| $t_p$ cation-cation                                     | 0.508 | 0.116 | 0.069 | 0.111 | 0.082 |

**Table S7** – Parameter  $n$  for Carreau equation fit for the dependence of viscosity, dimer lifetime and relative differences of radial distribution function with the shear rate in the five systems studied

| Property                                                | S1    | S2     | S3    | S4    | S5    |
|---------------------------------------------------------|-------|--------|-------|-------|-------|
| viscosity                                               | 0.472 | 0.624  | 0.691 | 0.599 | 0.670 |
| $E_{\text{coul}}$                                       | 0.985 | 0.970  | ----  | ----  | ----  |
| $E_{\text{dispesion}}$                                  | 0.981 | 0.981  | 0.981 | 0.977 | 0.978 |
| $\Delta g(r)_{\text{rel}}$ cation-anion 1 <sup>st</sup> | 0.926 | 0.880  | 0.842 | 0.867 | 0.850 |
| $\Delta g(r)_{\text{rel}}$ cation-anion 2 <sup>nd</sup> | 0.657 | 0.600  | ----  | ----  | ----  |
| $\Delta g(r)_{\text{rel}}$ cation-anion 3 <sup>rd</sup> | 0.492 | -0.012 | 0.351 | 0.503 | 0.491 |
| $\Delta g(r)_{\text{rel}}$ anion-anion                  | 1.171 | 1.098  | 1.018 | 1.027 | 1.017 |
| $\Delta g(r)_{\text{rel}}$ cation-cation                | 0.784 | 0.761  | ----  | ----  | ----  |
| $t_p$ cation-anion                                      | 0.294 | 0.376  | 0.453 | 0.379 | 0.414 |
| $t_p$ anion-anion                                       | 0.324 | 0.404  | 0.464 | 0.386 | 0.424 |
| $t_p$ cation-cation                                     | 0.265 | 0.394  | 0.543 | 0.420 | 0.502 |

### 3. Additional images with Carreau equation fit

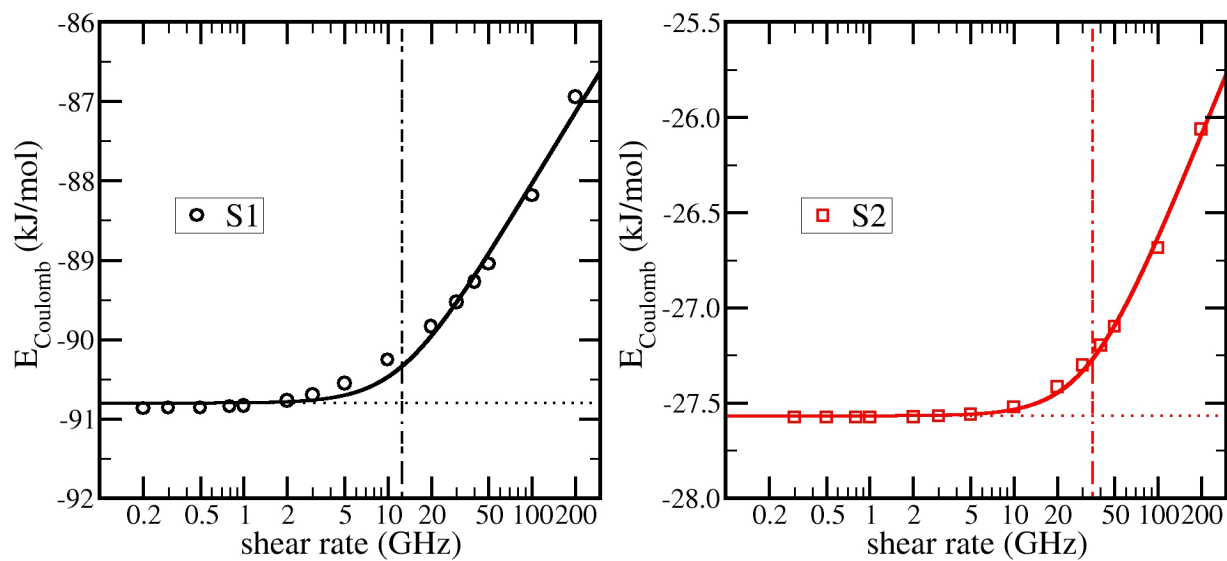

**Figure S1** – Electrostatic energy per ion pair in systems S1 (left) and S2 (right) at different shear rates. The solid lines are the Carreau equation fit, the horizontal dashed lines represent the value at zero shear computed by the best fit and vertical dashed lines give the reciprocal of the parameter  $\lambda$  in GHz.

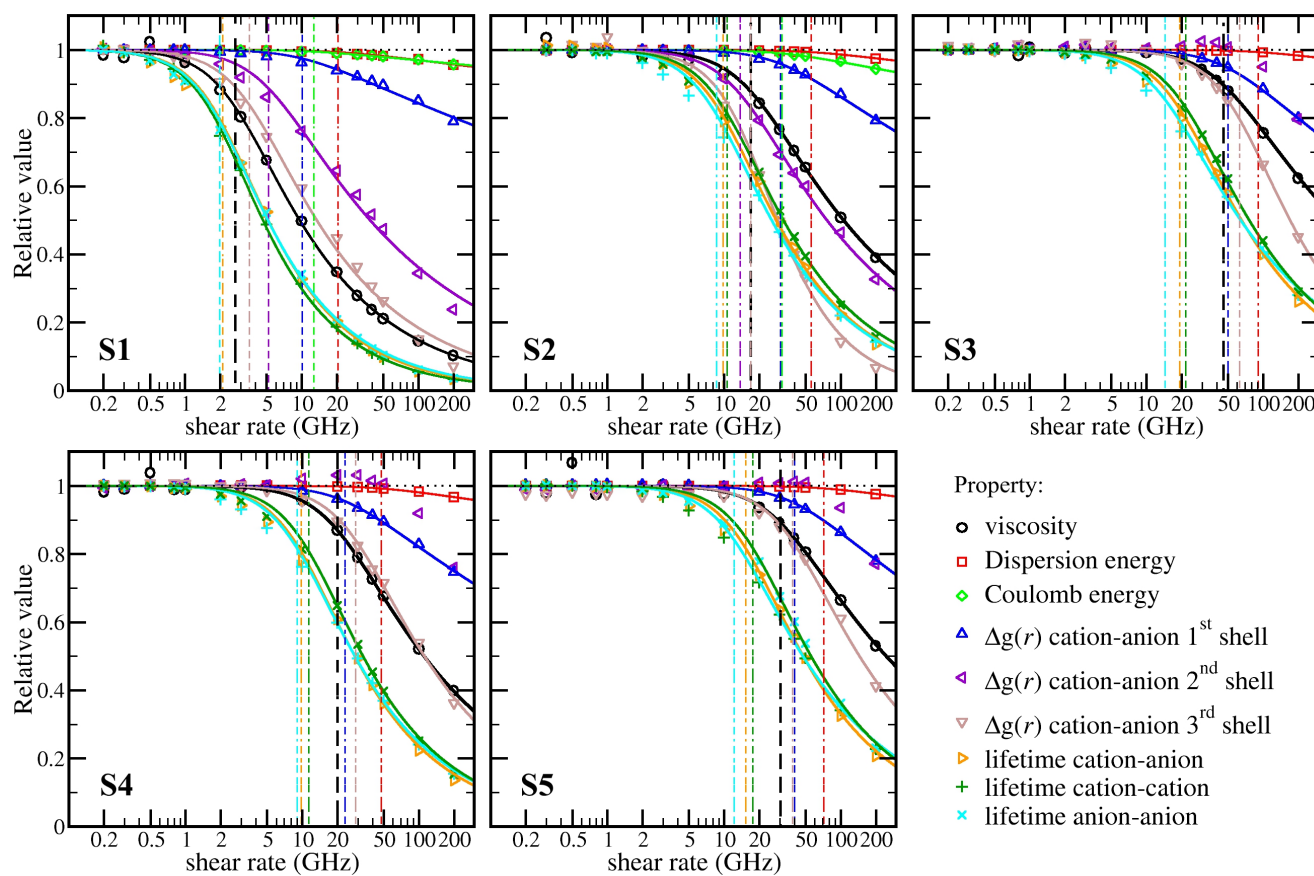

**Figure S2** – Relative changes of several properties in relation to zero shear value with Carreau equation fit (solid lines with the same colors). Vertical dashed lines indicates the values of  $\lambda^{-1}$  (GHz) for each fit.

#### 4. Cation-cation and anion-anion radial distribution function

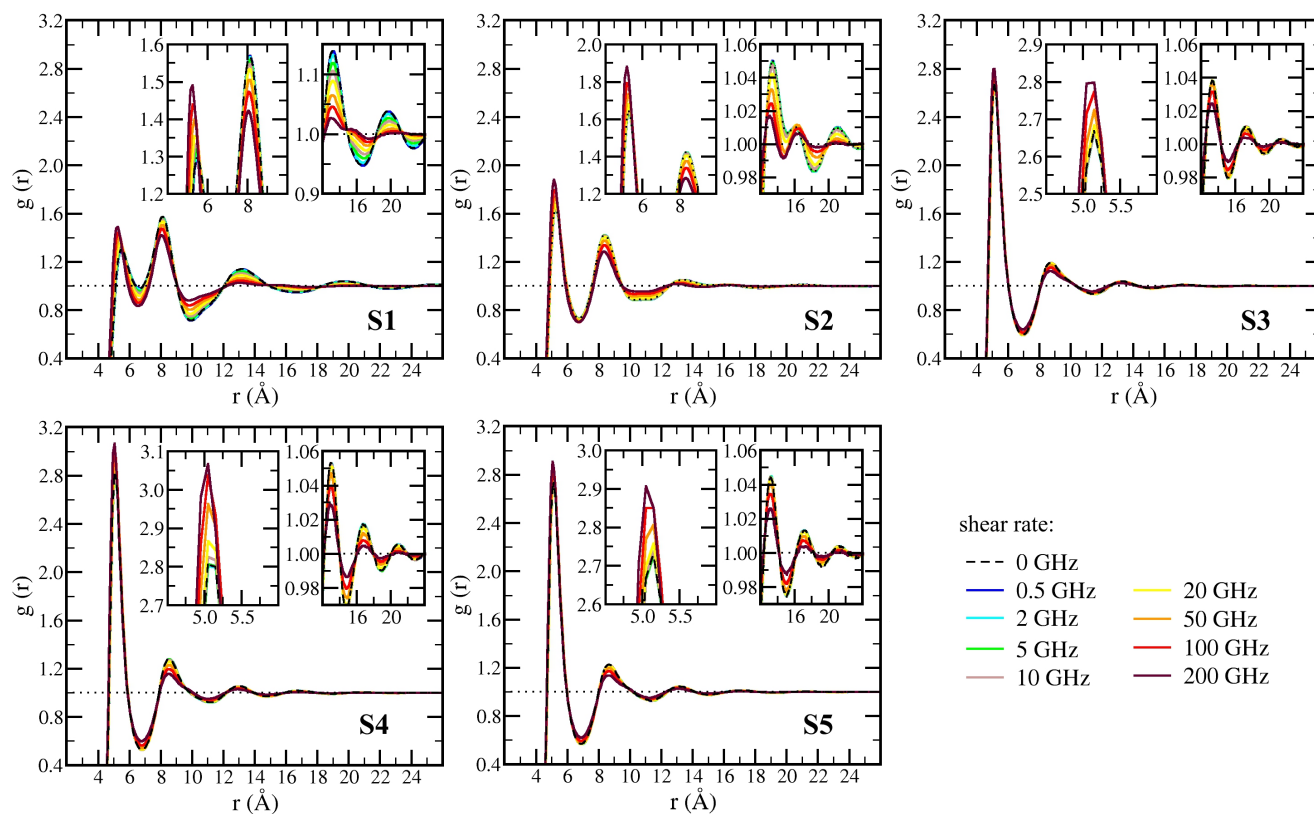

**Figure S3** – Anion – anion radial distribution function at several shear rates (different colors) for the five model systems with insets highlighting the first maximum and the long range structure.



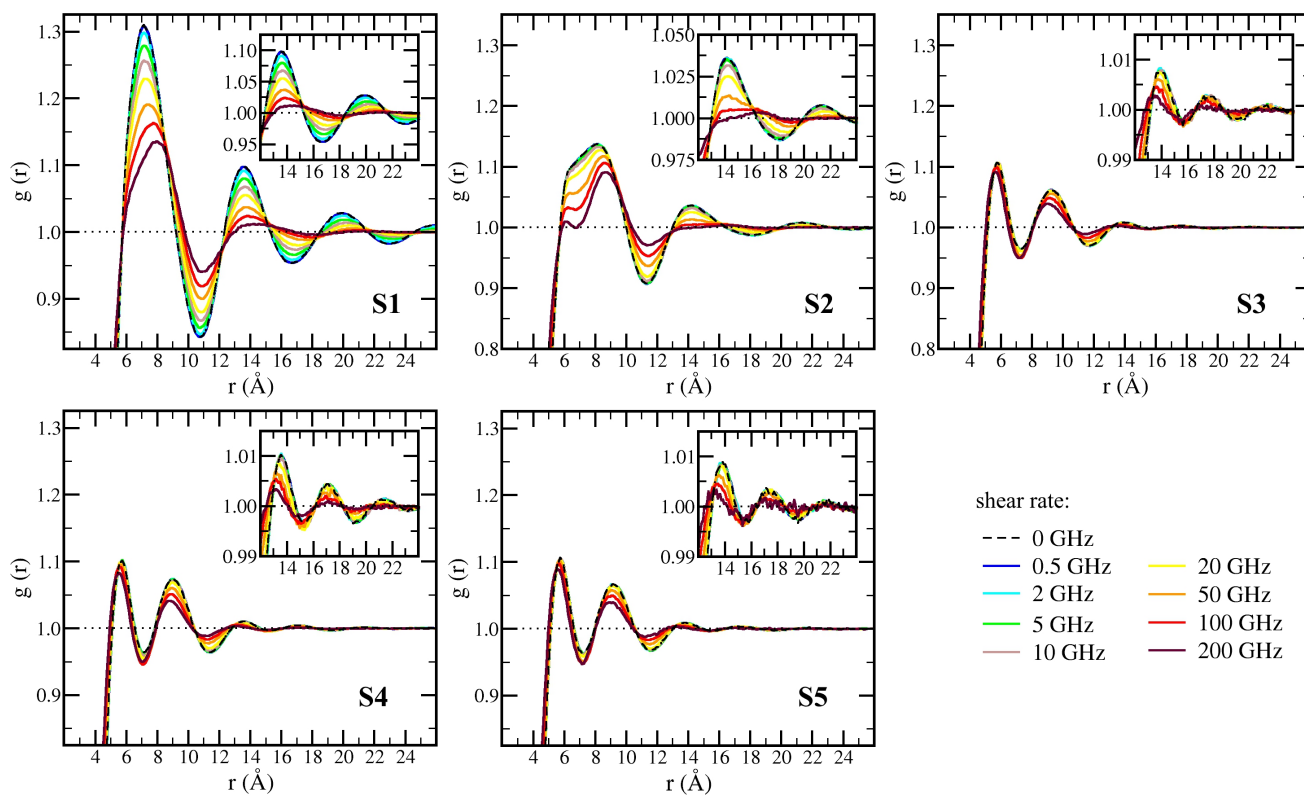

**Figure S4** – Cation – cation radial distribution function at several shear rates (different colors) for the five model systems with insets highlighting the first maximum and the long range structure.
